# Supplementary material
Source: HighWire-hosted journal article supplement (https://www.cmaj.ca/content/suppl/2021/05/04/193.19.E689)
Supplement: 191108-view-2-at.pdf [file 191108-view-2-at.pdf]

**Table 1: Characteristics and important considerations of surgical wounds after cardiac surgery**

|                                                                                                                                               | <b>Characteristics</b>                                                                                                       | <b>Important considerations</b>                                                                                                                                                                                                                                                                                   |
|-----------------------------------------------------------------------------------------------------------------------------------------------|------------------------------------------------------------------------------------------------------------------------------|-------------------------------------------------------------------------------------------------------------------------------------------------------------------------------------------------------------------------------------------------------------------------------------------------------------------|
| <b>Superficial sternal wound infection (SSWI)</b>                                                                                             | Infection involving skin, subcutaneous tissue, and/or fascia with no bony involvement                                        | Early diagnosis and aggressive antibiotic treatment are key to avoiding deep sternal wound infection                                                                                                                                                                                                              |
| <b>Deep sternal wound infection (DSWI)</b>                                                                                                    | SSWI with sternal and mediastinal involvement<br><br>Present with a sternal click and/or features of systemic inflammation   | Can present months after surgery<br><br>DSWI is a surgical emergency requiring urgent transfer to cardiac surgery for debridement<br><br>It is associated with high morbidity and mortality (1)                                                                                                                   |
| <b>Mechanical non-union</b>                                                                                                                   | Diagnosed by the presence of sternal movement with or without pain in the absence of infection                               | Contact patient's cardiac surgeon for sternal plating (2)                                                                                                                                                                                                                                                         |
| <b>Other incisions:</b><br><i>Graft site (saphenous vein, radial artery)</i><br><br><i>Pacemaker site</i><br><br><i>Femoral cut-down site</i> | All sites can become infected, develop a seroma or cause neuropathy<br><br>Additionally, at risk of pseudoaneurysm formation | Manage similar to other surgical wound infections. Seromas might require drainage<br><br>Aggressive wound infection management often needing hardware removal, thus needs to be referred back to implanting centre<br><br>Contact the cardiac surgeon if a pseudoaneurysm is suspected or confirmed by ultrasound |

1. Schimmer C, Reents W, Berneder S, Eigel P, Sezer O, Scheld H, et al. Prevention of Sternal Dehiscence and Infection in High-Risk Patients: A Prospective Randomized Multicenter Trial. *Ann Thorac Surg.* 2008;86(6):1897–904.
2. Huh J, Bakaeen F, Chu D, Wall MJ. Transverse sternal plating in secondary sternal reconstruction. *J Thorac Cardiovasc Surg.* 2008;136(6):1476–80.
